# Supplementary material for: Crosstalk between protein kinase C α and transforming growth factor β signaling mediated by Runx2 in intestinal epithelial cells
Source: PubMed Central journal article supplement — J Biol Chem. 2023 Feb 13;299(4):103017. doi: 10.1016/j.jbc.2023.103017 (PMC10036670; doi:10.1016/j.jbc.2023.103017), 2023-02-13
Supplement: mmc1.pdf [file mmc1.pdf]

# Figure S1

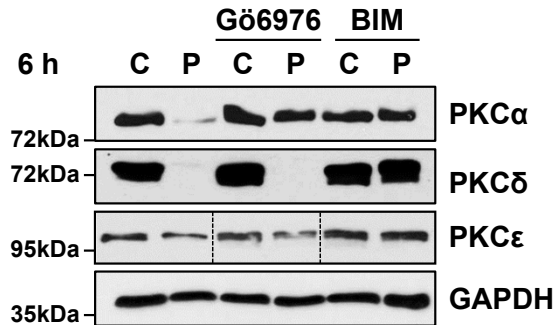

## Figure S1: Gö6976 selectively inhibits PKC $\alpha$ activity in IEC-18 cells.

IEC-18 cells express three PMA-responsive PKC isozymes: conventional PKC $\alpha$  and novel PKC $\delta$  and PKC $\epsilon$  (9). Gö6976 targets the conventional PKCs, while BIM is a pan-PKC inhibitor. The selectivity of Gö6976 for PKC $\alpha$  can be seen in its ability to block agonist (PMA)-induced, *activity-dependent* downregulation of PKC $\alpha$ , while not affecting the downregulation of PKC $\delta$  or PKC $\epsilon$ . Although PKC $\epsilon$  is more resistant to PMA-induced downregulation (7), the modest downregulation observed was blocked by the pan-PKC inhibitor BIM but not by Gö6976. C: Vehicle treated control; P: PMA. Each panel is from a single blot; dashed lines indicate rearrangement of the PKC $\epsilon$  blot for clarity.
