# Supplementary material for: Crosstalk between protein kinase C α and transforming growth factor β signaling mediated by Runx2 in intestinal epithelial cells
Source: PubMed Central journal article supplement — J Biol Chem. 2023 Feb 13;299(4):103017. doi: 10.1016/j.jbc.2023.103017 (PMC10036670; doi:10.1016/j.jbc.2023.103017), 2023-02-13
Supplement: mmc2.pdf [file mmc2.pdf]

# Figure S2

**A**

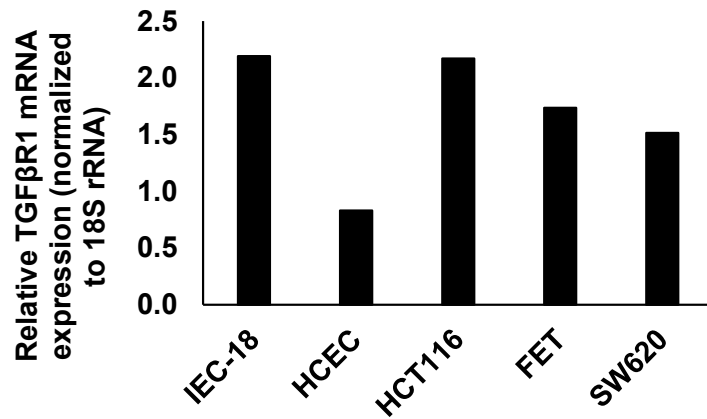

**B**

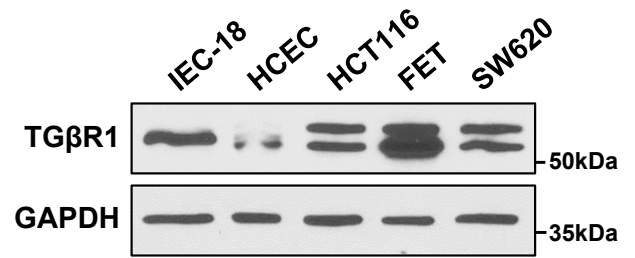

## Figure S2. Expression of TGFβR1 in intestinal cells.

Endogenous expression of *TGFβR1* mRNA (normalized to 18S rRNA) (**A**) and protein (**B**) in the indicated cell lines was determined by RT-qPCR and Western blotting, respectively. Data are representative of at least 2 independent experiments.
