# Supplementary material for: Crosstalk between protein kinase C α and transforming growth factor β signaling mediated by Runx2 in intestinal epithelial cells
Source: PubMed Central journal article supplement — J Biol Chem. 2023 Feb 13;299(4):103017. doi: 10.1016/j.jbc.2023.103017 (PMC10036670; doi:10.1016/j.jbc.2023.103017), 2023-02-13
Supplement: mmc3.pdf [file mmc3.pdf]

## Figure S3

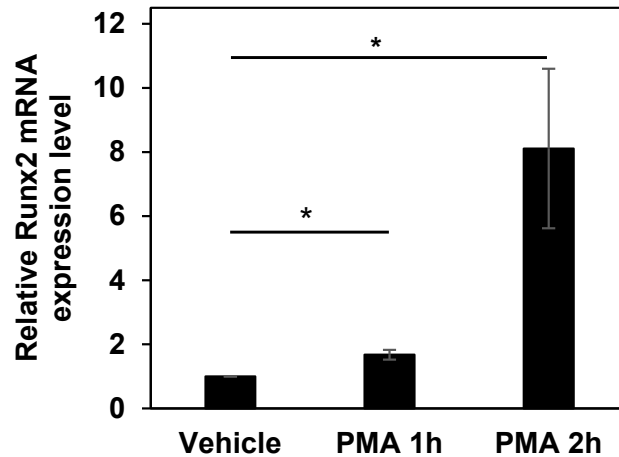

**Figure S3. PKC $\alpha$  activation robustly upregulates Runx2 mRNA expression by 2 h.**

IEC-18 cells were treated with vehicle or PMA for the indicated times and levels of Runx2 mRNA (normalized to 18 S RNA) were assessed by RT-qPCR. Data are averages  $\pm$  s.e.m. of at least 3 independent experiments. \*,  $p < 0.05$ .
